# Supplementary figures and images for: Multiple signaling pathways regulate the transcriptional activity of the orphan nuclear receptor NURR1
Source: PubMed Central journal article supplement — Nucleic Acids Res. 2006 Oct 4;34(19):5515–27. doi: 10.1093/nar/gkl712 (PMC1636490; doi:10.1093/nar/gkl712), 2006-10-04

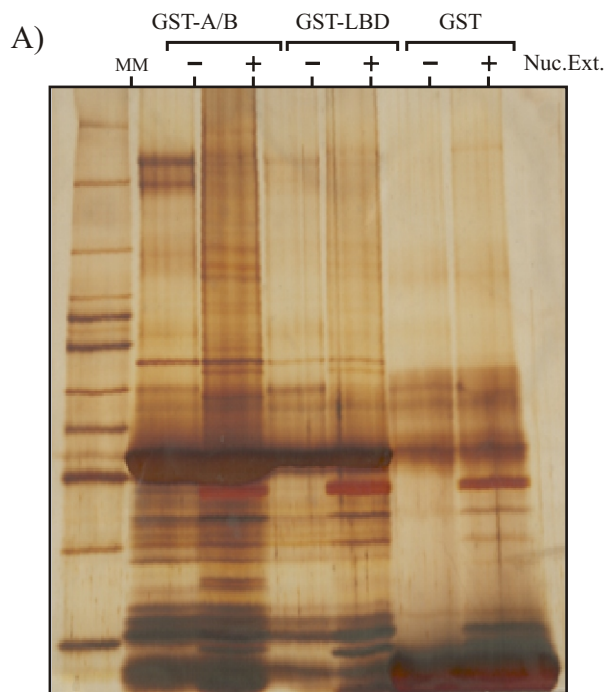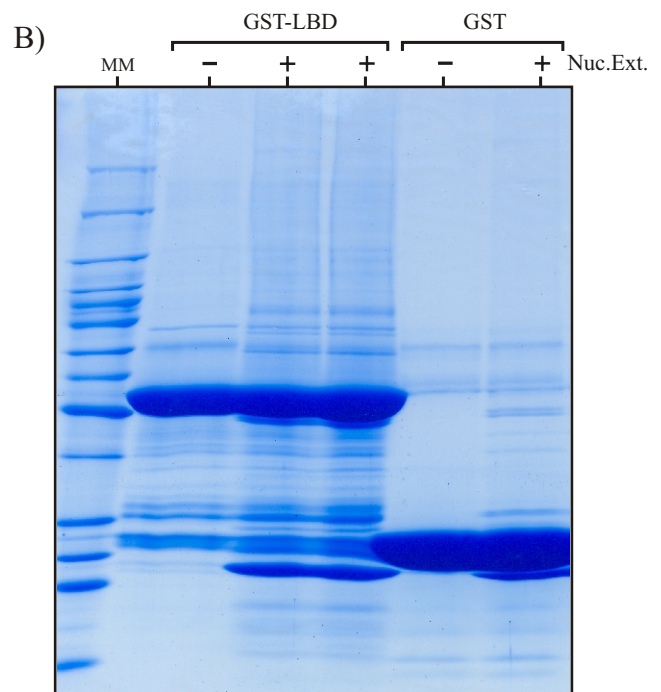

Sacchetti et al.; Supplemental Figure 8

Supplement: nar_gkl712_2.pdf [file nar_gkl712_2.pdf]
